# Supplementary material for: Photoelectrochemical water splitting using visible-light-responsive BiVO4 fine particles prepared in an aqueous acetic acid solution
Source: Royal Society of Chemistry journal article supplement (doi:10.1039/c0jm00961j), 2010-01-01
Supplement: c0jm00961j.pdf [file c0jm00961j.pdf]

# Photoelectrochemical water splitting using visible-light-responsive BiVO<sub>4</sub> fine particles prepared in an aqueous acetic acid solution

Akihide Iwase and Akihiko Kudo\*

*Department of Applied Chemistry, Faculty of Science, Tokyo University of Science,*

*1-3 Kagurazaka, Shinjuku-ku, Tokyo 162-8601 JAPAN*

## Supporting information

**Table S1.** Preparation conditions and denotations of BiVO<sub>4</sub> samples

| Denoted name of sample       | Preparation solution                          | Stirring time | Calcination condition | Crystal system   |
|------------------------------|-----------------------------------------------|---------------|-----------------------|------------------|
| 0.5N-BiVO <sub>4</sub> (s-m) | HNO <sub>3</sub> (0.5 mol L <sup>-1</sup> )   | 2 days        | None                  | s-m <sup>a</sup> |
| 1A-BiVO <sub>4</sub> (s-t)   | CH <sub>3</sub> COOH (1 mol L <sup>-1</sup> ) | 11 days       | None                  | s-t <sup>b</sup> |
| 1A-BiVO <sub>4</sub> (s-m)   | CH <sub>3</sub> COOH (1 mol L <sup>-1</sup> ) | 11 days       | 673K 5h               | s-m <sup>a</sup> |
| 2A-BiVO <sub>4</sub> (s-t)   | CH <sub>3</sub> COOH (2 mol L <sup>-1</sup> ) | 9 days        | None                  | s-t <sup>b</sup> |
| 2A-BiVO <sub>4</sub> (s-m)   | CH <sub>3</sub> COOH (2 mol L <sup>-1</sup> ) | 9 days        | 673K 5h               | s-m <sup>a</sup> |

<sup>a</sup> scheelite structure with monoclinic system, <sup>b</sup> scheelite structure with tetragonal system.

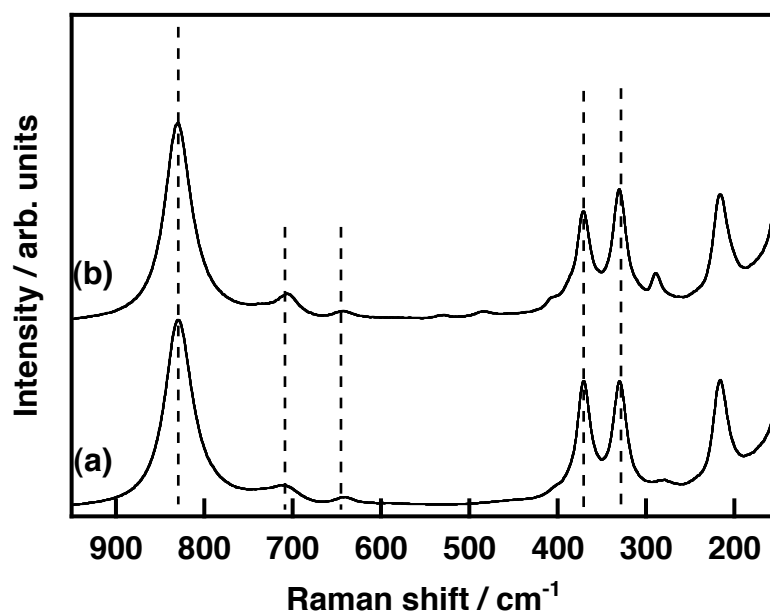

**Figure S1.** Raman spectra of  $\text{BiVO}_4$  prepared in (a)  $0.5 \text{ mol L}^{-1} \text{ HNO}_3$  for 2 days and (b)  $1 \text{ mol L}^{-1} \text{ CH}_3\text{COOH}$  for 11 days. Excitation wavelength: 785 nm. The sample (b) was calcined at 673K for 5h.

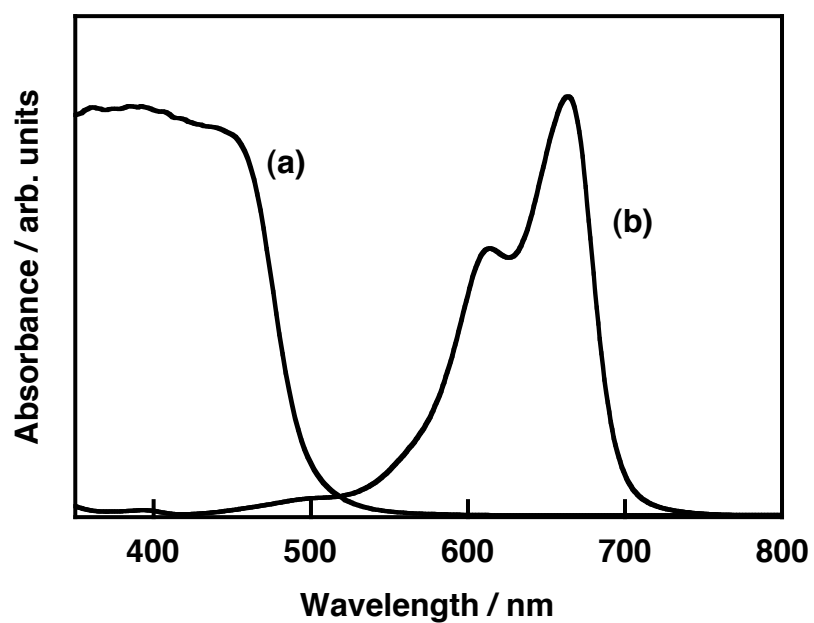

**Figure S2.** (a) A Diffuse reflectance spectrum of  $\text{BiVO}_4$  prepared in  $2 \text{ mol L}^{-1} \text{ CH}_3\text{COOH}$  for 9 days with calcination at 673K for 5h and (b) an absorption spectrum of methylene blue.
